# Supplementary material for: Face masks, respiratory patients and COVID-19
Source: PubMed Central journal article supplement — Eur Respir J. 2020 Nov 12;56(5):2003325. doi: 10.1183/13993003.03325-2020 (PMC7525001; doi:10.1183/13993003.03325-2020), 2020-11-12
Supplement: ERJ-03325-2020.Shareable.pdf [file ERJ-03325-2020.Shareable.pdf]

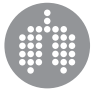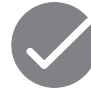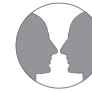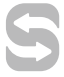

SHAREABLE PDF

# Face masks, respiratory patients and COVID-19

Joan B. Soriano <sup>1,2</sup>, Antonio Anzueto<sup>3,4</sup>, Sinthia Bosnic Anticevich<sup>5</sup>, Alan Kaplan<sup>6</sup>, Marc Miravittles <sup>2,7</sup>, Omar Usmani<sup>8</sup>, Nikolaos G. Papadopoulos<sup>9,10</sup>, Francesca Puggioni<sup>11,12</sup>, G. Walter Canonica<sup>11,12</sup> and Nicolas Roche<sup>13</sup>, on behalf of the Respiratory Effectiveness Group

**Affiliations:** <sup>1</sup>Servicio de Neumología, Hospital Universitario La Princesa, Madrid, Spain. <sup>2</sup>Centro de Investigación en Red de Enfermedades Respiratorias (CIBERES), Instituto de Salud Carlos III (ISCIII), Madrid, Spain. <sup>3</sup>Division of Pulmonary Diseases and Critical Care Medicine, The University of Texas Health, San Antonio, TX, USA. <sup>4</sup>Pulmonary Diseases Section, Audie L. Murphy Memorial VA Hospital, South Texas Veterans Health Care System, San Antonio, TX, USA. <sup>5</sup>Woolcock Institute of Medical Research, The University of Sydney, Sydney Local Health District, Sydney, Australia. <sup>6</sup>Dept of Family and Community Medicine, University of Toronto, Toronto, ON, Canada. <sup>7</sup>Pneumology Dept, Hospital Universitari Vall d'Hebron, Vall d'Hebron Institut de Recerca (VHIR), Vall d'Hebron Barcelona Hospital Campus, Barcelona, Spain. <sup>8</sup>National Heart and Lung Institute, Imperial College London and Royal Brompton Hospital, Airways Disease Section, London, UK. <sup>9</sup>Division of Infection, Immunity and Respiratory Medicine, University of Manchester, Manchester, UK. <sup>10</sup>Allergy Dept, 2nd Pediatric Clinic, National and Kapodistrian University of Athens, Athens, Greece. <sup>11</sup>Personalized Medicine, Asthma and Allergy, Humanitas Clinical and Research Center, IRCCS, Rozzano, Italy. <sup>12</sup>Dept of Biomedical Sciences, Humanitas University, Pieve Emanuele, Italy. <sup>13</sup>Respiratory Medicine, Hôpital Cochin, APHP Centre, Université de Paris (UMR1016, Institut Cochin), Paris, France.

**Correspondence:** Joan B. Soriano, Servicio de Neumología, Hospital Universitario La Princesa, Madrid, Spain. E-mail: jbsoriano2@gmail.com

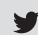

@ERSpublications

**Exemptions of respiratory patients on the compulsory use of face masks for COVID-19 pandemic are not evidence-based** <https://bit.ly/2DTu7Y0>

**Cite this article as:** Soriano JB, Anzueto A, Bosnic Anticevich S, *et al.* Face masks, respiratory patients and COVID-19. *Eur Respir J* 2020; 56: 2003325 [https://doi.org/10.1183/13993003.03325-2020].

This single-page version can be shared freely online.

## To the Editor:

Several countries have applied exemptions of respiratory patients on the compulsory use of face masks indoors and outdoors during the coronavirus disease 2019 (COVID-19) pandemic. It must be strongly stated that such exemption is not evidence-based, and it may carry increased risk of personal infection to the estimated 544.9 million people worldwide suffering a chronic respiratory disease [1].
